# Supplementary material for: Highly sensitive and selective complexation based voltammetric methods for the analysis of rabeprazole sodium in real samples
Source: Royal Society of Chemistry journal article supplement (doi:10.1039/c6ra25565e), 2017-01-01
Supplement: c6ra25565e1.pdf [file c6ra25565e1.pdf]

## Supplementary data

### Figures

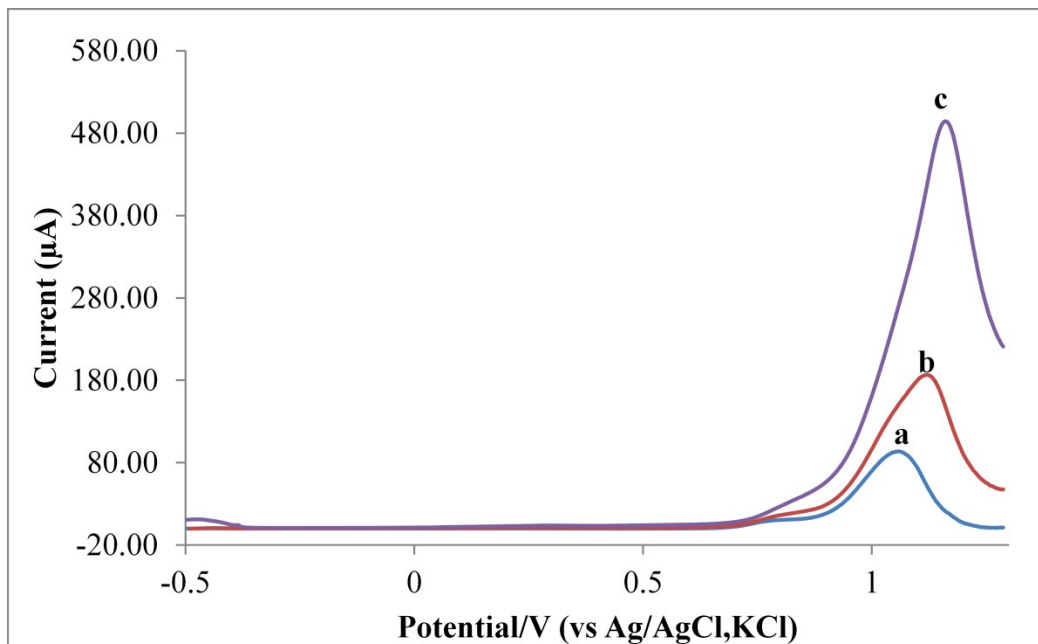

**Fig.1S.** The SWAdSV of 6.5 nM RAB sodium in presence of 65 μM cobalt nitrate at:

a. GCE

b. CPE

c. PGE

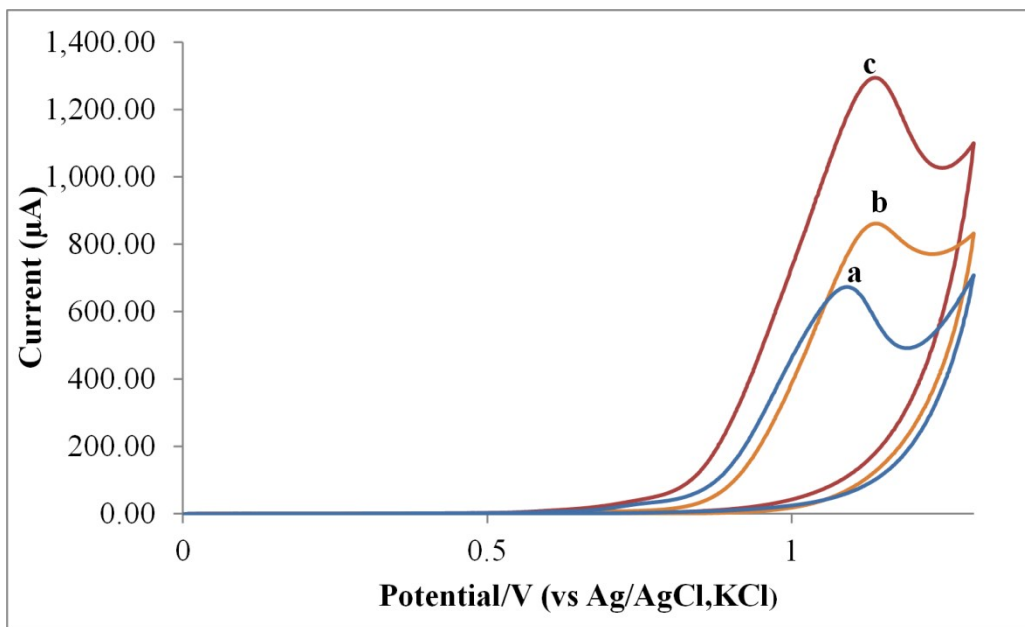

**Fig.2S.** The CV of RAB Na with 65  $\mu\text{M}$  cobalt nitrate: (a) acetate buffer (pH=7.0) (b) Phosphate buffer (pH=7.0) (c) B.R. buffer (pH=7.0).

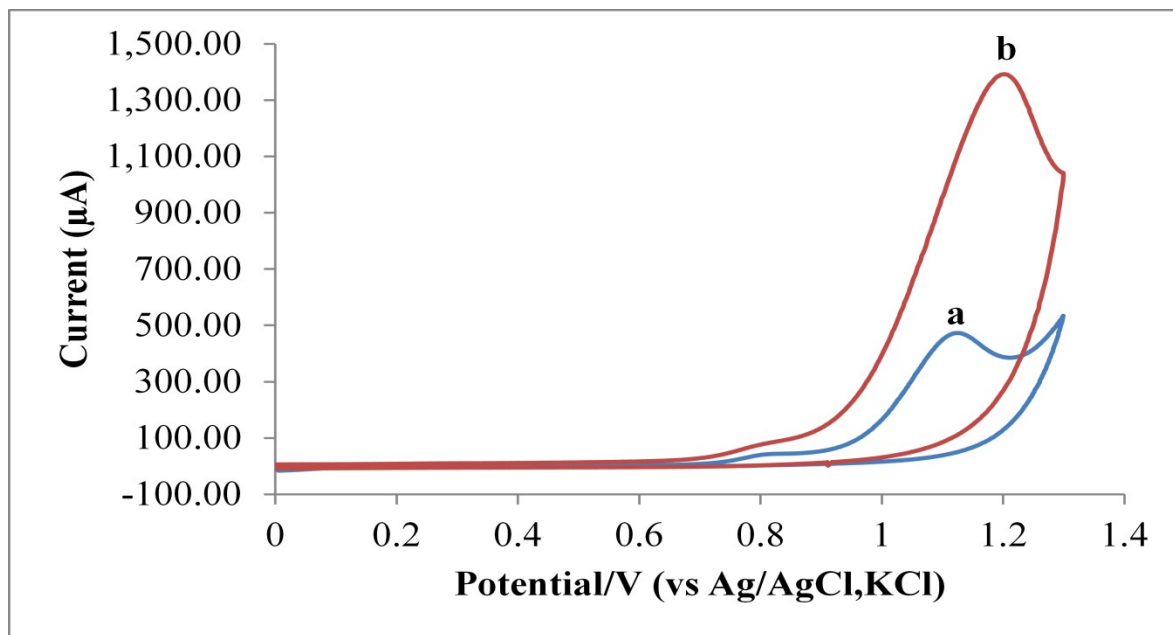

**Fig.3S.** The CV of  $6.5 \times 10^{-8}$  M RAB sodium using cobalt after deposition on PGE followed by complexation (a) and direct complexation without deposition (b).

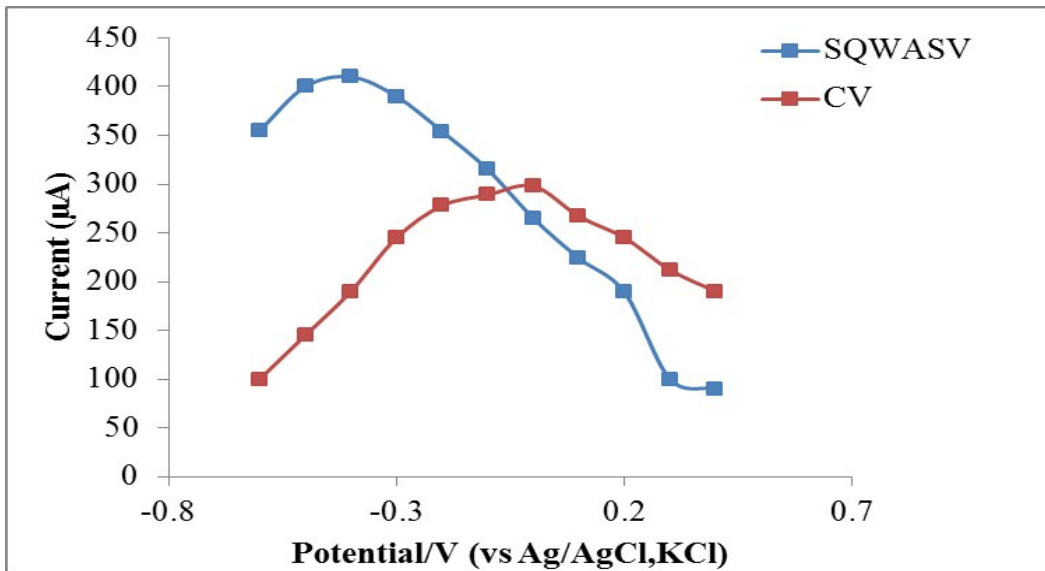

**Fig.4S.** Effect of initial potential on peak current of CV and SWAdSV.

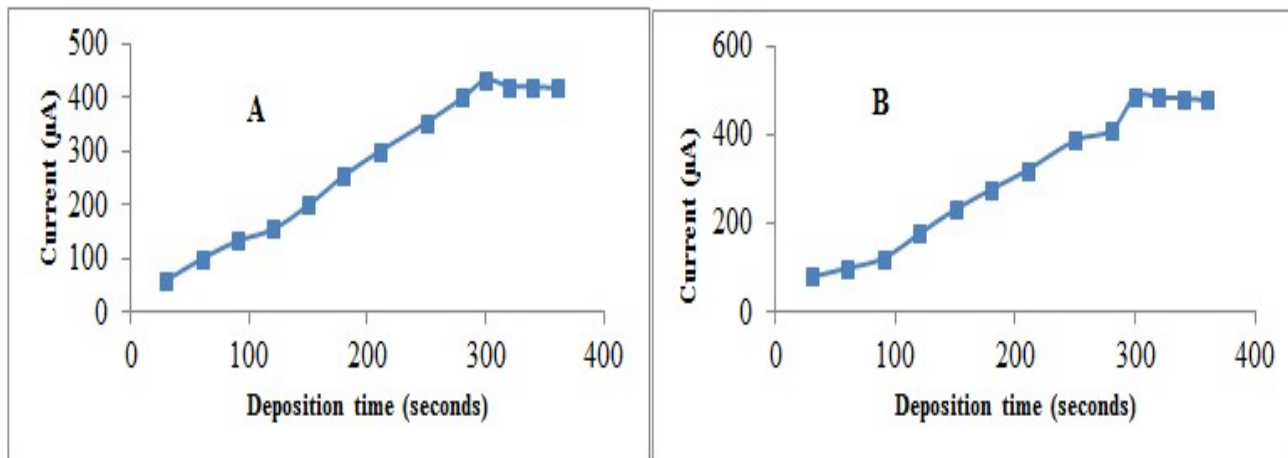

**Fig.5S.** Effect of deposition time on peak current of CV (A) and SWAdSV (B).

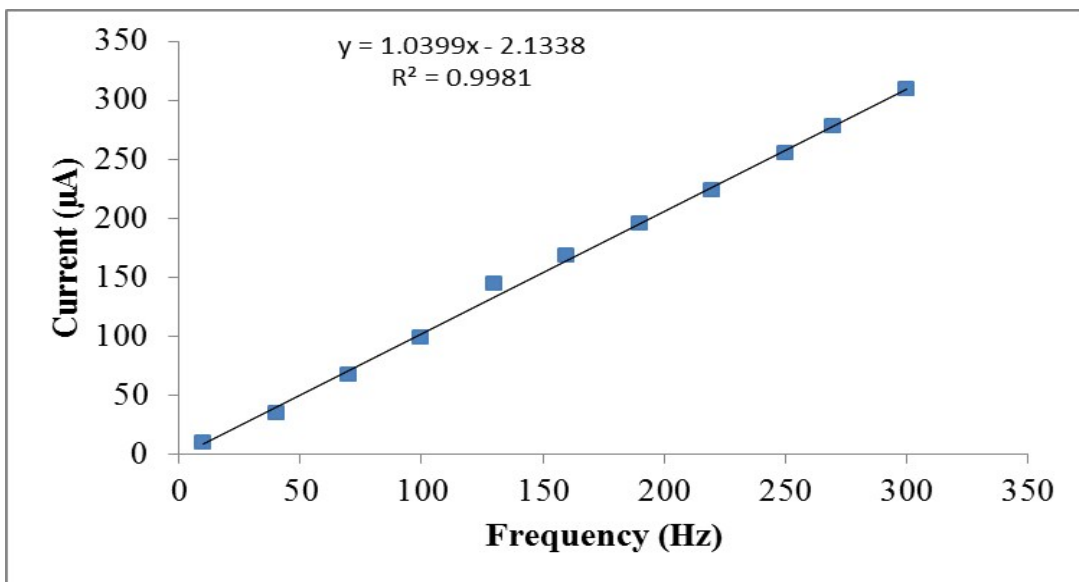

**Fig.6S.** Effect of frequency on SWAdSV of 6.5 nM RAB sodium.

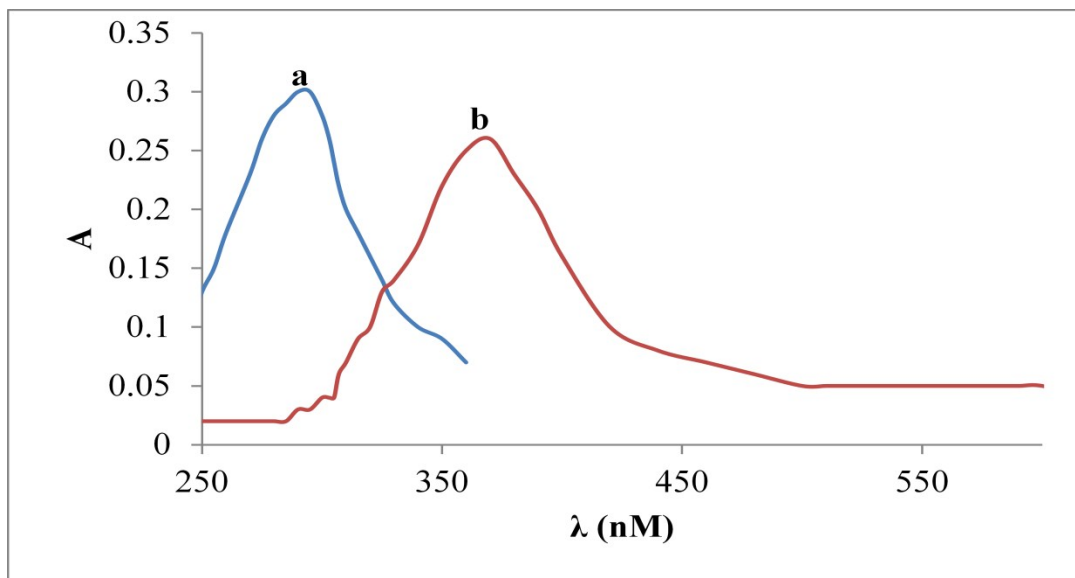

**Fig.7S.** UV-Vis spectra of 0.6  $\mu$ M RAB sodium (a) in B.R. buffer (pH=7.0) and after addition of 65  $\mu$ M cobalt nitrate (b).

## Supplementary tables

**Table 1S.** Quantitative parameters for the proposed methods for determination of RAB sodium in model urine samples.

| Parameters                  | SWAdSV <sup>a</sup> |              | CV <sup>a</sup> |              |
|-----------------------------|---------------------|--------------|-----------------|--------------|
|                             | Volunteer A         | Volunteer B  | Volunteer A     | Volunteer B  |
| Measured potential (volts)  | 1.15                | 1.20         | 1.17            | 1.18         |
| Linearity                   | 5-31                | 5-31         | 5-31            | 5-31         |
| Correlation coefficient (r) | 0.9992±             | 0.9990±      | 0.9983±         | 0.9983±      |
| ± SD*                       | 0.003               | 0.005        | 0.003           | 0.007        |
| Intercept± SD               | 18.8± 0.01          | -12.23± 0.03 | -0.09±0.001     | -0.06±0.0008 |
| Slope± SD                   | 15.1 ± 0.15         | 14.23± 0.05  | 0.07±0.001      | 0.075±0.0005 |
| LOD*                        | 0.002               | 0.007        | 0.047           | 0.035        |
| LOQ*                        | 0.066               | 0.021        | 0.143           | 0.107        |

<sup>a</sup> Concentration in SWAdSV expressed as 10<sup>-8</sup> M while in CV expressed as 10<sup>-6</sup>M.

\* Average of five replicates.



**Table 2S.** Recovery analysis of RAB sodium in spiked human urine samples using proposed methods.

| Added amount | SWAdSV <sup>a</sup> |            |             |            | CV <sup>a</sup> |            |             |            |
|--------------|---------------------|------------|-------------|------------|-----------------|------------|-------------|------------|
|              | Volunteer A         |            | Volunteer B |            | Volunteer A     |            | Volunteer B |            |
|              | Found± SD*          | % Recovery | Found± SD*  | % Recovery | Found± SD*      | % Recovery | Found± SD*  | % Recovery |
| 6            | 6.3                 | 105.0± 3.5 | 6.2         | 103.3± 4.1 | 6.2             | 103.3± 3.9 | 6.4         | 106.6± 3.8 |
| 13           | 13.5                | 103.8± 2.9 | 13.7        | 105.4± 2.8 | 13.2            | 101.5± 4.1 | 12.5        | 96.2± 2.7  |
| 19           | 19.7                | 103.7± 3.1 | 19.4        | 102.1± 2.9 | 18.6            | 94.4± 2.8  | 18.7        | 98.4± 3.7  |

<sup>a</sup> Concentration in SWAdSV expressed as 10<sup>-8</sup> M while in CV expressed as 10<sup>-6</sup> M.

\* Average of five replicates.
